# Supplementary material
Source: HighWire-hosted journal article supplement (https://erj.ersjournals.com/content/51/5/1701873)
Supplement: inline-supplementary-material-1 [file inline-supplementary-material-1.pdf]

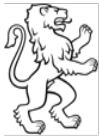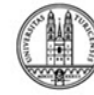

**CAROL GP Questionnaire T0 (at patient inclusion) Patient ID: «Number of GP»-«Number of patient»**

|   |      |                       |
|---|------|-----------------------|
| 0 | Date | _ _ _ . _ _ _ . _ _ _ |
|---|------|-----------------------|

**1. General information**

|     |                            |                                                                                                         |
|-----|----------------------------|---------------------------------------------------------------------------------------------------------|
| 1.1 | Sex                        | <input type="checkbox"/> <sub>(1)</sub> male <input type="checkbox"/> <sub>(2)</sub> female             |
| 1.2 | Birthdate                  | _ _ _ . _ _ _ . _ _ _                                                                                   |
| 1.3 | Ethnicity                  | <input type="checkbox"/> <sub>(1)</sub> Caucasian <input type="checkbox"/> <sub>(2)</sub> Non-caucasian |
| 1.4 | COPD previously diagnosed? | <input type="checkbox"/> <sub>(1)</sub> Yes <input type="checkbox"/> <sub>(2)</sub> No                  |
| 1.5 |                            | If Yes: when (Year):  _ _ _                                                                             |

**2. Current measures**

|     |                            |                                                                                                                                                                                                                                                                                                                                                                                                                                                                                                                                                                                                                                                                                                     |
|-----|----------------------------|-----------------------------------------------------------------------------------------------------------------------------------------------------------------------------------------------------------------------------------------------------------------------------------------------------------------------------------------------------------------------------------------------------------------------------------------------------------------------------------------------------------------------------------------------------------------------------------------------------------------------------------------------------------------------------------------------------|
| 2.1 | Height                     | _ _ _  cm (without shoes)                                                                                                                                                                                                                                                                                                                                                                                                                                                                                                                                                                                                                                                                           |
| 2.2 | Weight                     | _ _ _  kg (without shoes)                                                                                                                                                                                                                                                                                                                                                                                                                                                                                                                                                                                                                                                                           |
| 2.3 | Smoking state              | <input type="checkbox"/> <sub>(1)</sub> Current smoker                                                                                                                                                                                                                                                                                                                                                                                                                                                                                                                                                                                                                                              |
| 2.4 |                            | <input type="checkbox"/> <sub>(2)</sub> ex-smoker                                                                                                                                                                                                                                                                                                                                                                                                                                                                                                                                                                                                                                                   |
|     |                            | If ex-smoker: quitting month.year  _ _ . _ _ _                                                                                                                                                                                                                                                                                                                                                                                                                                                                                                                                                                                                                                                      |
| 2.5 | Pack-Years (PY)            | _ _ _  PY (Average packs per day multiplied with number of years as smoker)                                                                                                                                                                                                                                                                                                                                                                                                                                                                                                                                                                                                                         |
| 2.6 | Current symptoms           | <input type="checkbox"/> <sub>(1)</sub> Cough                                                                                                                                                                                                                                                                                                                                                                                                                                                                                                                                                                                                                                                       |
| 2.7 |                            | <input type="checkbox"/> <sub>(1)</sub> Sputum                                                                                                                                                                                                                                                                                                                                                                                                                                                                                                                                                                                                                                                      |
| 2.8 |                            | <input type="checkbox"/> <sub>(1)</sub> Dyspnea                                                                                                                                                                                                                                                                                                                                                                                                                                                                                                                                                                                                                                                     |
| 2.9 | Severity according to mMRC | <input type="checkbox"/> <sub>(0)</sub> Grade 0: breathless only with strenuous exercise<br><input type="checkbox"/> <sub>(1)</sub> Grade 1: short of breath when hurrying on level ground or walking up a slight hill<br><input type="checkbox"/> <sub>(2)</sub> Grade 2: on level ground, walking slower than people of the same age because of breathlessness, or having to stop for breath when walking at own pace on the level<br><input type="checkbox"/> <sub>(3)</sub> Grade 3: stopping for breath after walking about 100 yards or after a few minutes on level ground<br><input type="checkbox"/> <sub>(4)</sub> Grade 4: too breathless to leave the house or breathless when dressing |

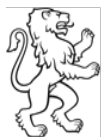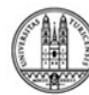

**CAROL GP Questionnaire T0 (at patient inclusion) Patient ID:«Number of GP»-«Number of patient»**

|      |                    |                    |               |
|------|--------------------|--------------------|---------------|
| 2.10 | Current Spirometry | FEV1/FVC           | I Q I . _ _ _ |
| 2.11 |                    | FEV1 in Liter      | _ _ . _ _ L   |
| 2.12 |                    | FEV1 % of expected | _ _ _ _ %     |

**3. Co-occurring conditions**

|     |                          |                                             |                                            |
|-----|--------------------------|---------------------------------------------|--------------------------------------------|
| 3.1 | Diabetes Type II         | <input type="checkbox"/> <sub>(1)</sub> Yes | <input type="checkbox"/> <sub>(2)</sub> No |
| 3.2 | Hypertension             | <input type="checkbox"/> <sub>(1)</sub> Yes | <input type="checkbox"/> <sub>(2)</sub> No |
| 3.3 | Coronary Heart Disease   | <input type="checkbox"/> <sub>(1)</sub> Yes | <input type="checkbox"/> <sub>(2)</sub> No |
| 3.4 | Congestive Heart Failure | <input type="checkbox"/> <sub>(1)</sub> Yes | <input type="checkbox"/> <sub>(2)</sub> No |
| 3.5 | Depression               |                                             |                                            |
| 3.6 | Other                    | .....                                       |                                            |

**4. COPD history and exacerbations of previous 12 monts**

|     |                                                                                                       |                                                                    |
|-----|-------------------------------------------------------------------------------------------------------|--------------------------------------------------------------------|
| 4.1 | Number of COPD-driven practice visits during the last 12 months                                       | I _ _ _                                                            |
| 4.2 | Number of emergency practice visits because of COPD during the last 12 months                         | I _ _ _                                                            |
| 4.3 | Number of COPD exacerbations during the last 12 months                                                | <input type="checkbox"/> <sub>(1)</sub> Unknown<br>→ continue to 5 |
| 4.4 |                                                                                                       | <input type="checkbox"/> <sub>(2)</sub> Known, number: I _ _ _     |
| 4.5 | Number of exacerbations with outpatients treatment in emergency departments during the last 12 months | I _ _ _                                                            |
| 4.6 | Number of exacerbations with hospitalisation during the last 12 months                                | I _ _ _                                                            |

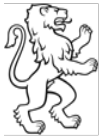

**CAROL** GP Questionnaire T0 (at patient inclusion) Patient ID: «Number of GP»-«Number of patient»

**5. Current pulmonary medication (incl. oxygen)**

|     | Product name | Dose  | Regimen                  |                          |                          |                          |                          |
|-----|--------------|-------|--------------------------|--------------------------|--------------------------|--------------------------|--------------------------|
|     |              |       | morning                  | midday                   | evening                  | night                    | as needed                |
| 5.1 | .....        | ..... | <input type="checkbox"/> | <input type="checkbox"/> | <input type="checkbox"/> | <input type="checkbox"/> | <input type="checkbox"/> |
| 5.2 | .....        | ..... | <input type="checkbox"/> | <input type="checkbox"/> | <input type="checkbox"/> | <input type="checkbox"/> | <input type="checkbox"/> |
| 5.3 | .....        | ..... | <input type="checkbox"/> | <input type="checkbox"/> | <input type="checkbox"/> | <input type="checkbox"/> | <input type="checkbox"/> |
| 5.4 | .....        | ..... | <input type="checkbox"/> | <input type="checkbox"/> | <input type="checkbox"/> | <input type="checkbox"/> | <input type="checkbox"/> |
| 5.5 | .....        | ..... | <input type="checkbox"/> | <input type="checkbox"/> | <input type="checkbox"/> | <input type="checkbox"/> | <input type="checkbox"/> |
| 5.6 | .....        | ..... | <input type="checkbox"/> | <input type="checkbox"/> | <input type="checkbox"/> | <input type="checkbox"/> | <input type="checkbox"/> |

**Thank you!**

**Please do not forget!** The number on the questionnaire must match the patient ID number.

Please return the questionnaire using the prestamped envelope or by Fax to the number 044 255 90 97

Please contact us if you have any questions!

Tel. 044 255 98 55

PD Dr.med. C. Steurer-Stey

Prof. Dr. med. Thomas Rosemann

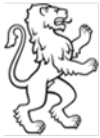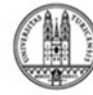

## CAROL GP Questionnaire T1 (after 12 months)

Patient ID     -    

**Please do not forget! The number on the questionnaire must match the patient ID number.**

|     |                                                                              |                                                                                                                                           |
|-----|------------------------------------------------------------------------------|-------------------------------------------------------------------------------------------------------------------------------------------|
| 0.1 | Date                                                                         | _ _ . _ _ _ _ _ _ _ _                                                                                                                     |
| 0.2 | Is the patient still participating in the trial ?                            | <input type="checkbox"/> Yes → go to 1.<br><input type="checkbox"/> No                                                                    |
| 0.3 | Patient dropped out:<br>Please state the reason and finish the questionnaire | <input type="checkbox"/> Died<br><input type="checkbox"/> Moved away<br><input type="checkbox"/> other Reason: .....<br>→ go to last page |

### 1. General information

|     |                                                      |                                                                                                |
|-----|------------------------------------------------------|------------------------------------------------------------------------------------------------|
| 1.1 | Sex                                                  | <input type="checkbox"/> männlich <input type="checkbox"/> weiblich                            |
| 1.2 | Birthdate                                            | _ _ . _ _ _ _ _ _ _ _                                                                          |
| 1.3 | Have you made a new spirometry since study inclusion | <input type="checkbox"/> Yes    Date .....<br><input type="checkbox"/> No      → continue to 2 |
| 1.4 | Current FEV1                                         | FEV1 in Liter     _ . _ _  L<br>FEV1 % expected  _ _ _                                         |

### 2. Smoking

|     |                                             |                                                                                                                                                                                                                                              |
|-----|---------------------------------------------|----------------------------------------------------------------------------------------------------------------------------------------------------------------------------------------------------------------------------------------------|
| 2.1 | Current smoking status                      | <input type="checkbox"/> Ex-smoker before January 2015 → continue to 3.1<br><input type="checkbox"/> Current smoker<br><input type="checkbox"/> Current smoking state unknown<br><input type="checkbox"/> Stopped smoking after January 2015 |
| 2.2 | Smoking cessation tries since January 2015? | <input type="checkbox"/> No smoking cessation tries<br><input type="checkbox"/> Cessation temporarily achieved<br><input type="checkbox"/> Cessation ongoing                                                                                 |

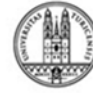

## CAROL GP Questionnaire T1 (after 12 months)

Patient ID \_\_-\_\_

|     |                                                                                                                       |                                                                                                                                                                                                  |
|-----|-----------------------------------------------------------------------------------------------------------------------|--------------------------------------------------------------------------------------------------------------------------------------------------------------------------------------------------|
| 2.3 | During the last 12 months:<br>Have you asked the patients about his motivation to quit smoking?                       | <input type="checkbox"/> Yes<br><input type="checkbox"/> No                                                                                                                                      |
| 2.4 | Have you used a scale from 0-10 to measure the motivation?                                                            | <input type="checkbox"/> Yes → Value  __ __ <br><input type="checkbox"/> No                                                                                                                      |
| 2.5 | During the last 12 months:<br>Have you motivated the patient to quit smoking?                                         | <input type="checkbox"/> Yes<br><input type="checkbox"/> No                                                                                                                                      |
| 2.6 | During the last 12 months:<br>Have you initiated any smoking cessation interventions (pharmacotherapy or counselling) | <input type="checkbox"/> Yes, in my practice<br><input type="checkbox"/> Yes, I referred to patient<br><input type="checkbox"/> No<br><input type="checkbox"/> I offered but the patient refused |

### 3. COPD history and consultations during the last 12 months

**Exacerbations are defined as acute worsening of symptoms lasting over more than 24 hours requiring therapy adjustments with systemic steroids or antibiotics.**

|     |                                                                                                                                   |                                                                               |
|-----|-----------------------------------------------------------------------------------------------------------------------------------|-------------------------------------------------------------------------------|
| 3.1 | Have you asked the patient about the number of acute and lasting worsening of symptoms / exacerbations during the last 12 months? | <input type="checkbox"/> Yes<br><input type="checkbox"/> No → continue to 3.3 |
| 3.2 | Number of COPD exacerbations during the last 12 months                                                                            | __ __                                                                         |
| 3.3 | Number of exacerbations with hospitalisation during the last 12 months                                                            | __ __                                                                         |
| 3.4 | Number of exacerbations with outpatients treatment in emergency departments during the last 12 months                             | __ __                                                                         |
| 3.5 | Number of emergency practice visits because of COPD during the last 12 months                                                     | __ __                                                                         |
| 3.6 | Number of planned practice visits because of COPD during the last 12 months                                                       | __ __                                                                         |

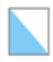

## CAROL GP Questionnaire T1 (after 12 months)

Patient ID \_\_\_\_-\_\_\_\_

### 4. Current pulmonary medication

|     | Product name | Dose  | Regimen                  |                          |                          |                          |                          |
|-----|--------------|-------|--------------------------|--------------------------|--------------------------|--------------------------|--------------------------|
|     |              |       | morning                  | midday                   | evening                  | night                    | as needed                |
| 4.1 | .....        | ..... | <input type="checkbox"/> | <input type="checkbox"/> | <input type="checkbox"/> | <input type="checkbox"/> | <input type="checkbox"/> |
| 4.2 | .....        | ..... | <input type="checkbox"/> | <input type="checkbox"/> | <input type="checkbox"/> | <input type="checkbox"/> | <input type="checkbox"/> |
| 4.3 | .....        | ..... | <input type="checkbox"/> | <input type="checkbox"/> | <input type="checkbox"/> | <input type="checkbox"/> | <input type="checkbox"/> |
| 4.4 | .....        | ..... | <input type="checkbox"/> | <input type="checkbox"/> | <input type="checkbox"/> | <input type="checkbox"/> | <input type="checkbox"/> |
| 4.5 | .....        | ..... | <input type="checkbox"/> | <input type="checkbox"/> | <input type="checkbox"/> | <input type="checkbox"/> | <input type="checkbox"/> |
| 4.6 | .....        | ..... | <input type="checkbox"/> | <input type="checkbox"/> | <input type="checkbox"/> | <input type="checkbox"/> | <input type="checkbox"/> |

### 5-8. Additional measures:

|     |                                                                                                     |                                                                                                                                                                                        |
|-----|-----------------------------------------------------------------------------------------------------|----------------------------------------------------------------------------------------------------------------------------------------------------------------------------------------|
| 5   | <b>Influenza vaccination</b>                                                                        |                                                                                                                                                                                        |
| 5.1 | During the last 12 months:<br>Have you administered an<br>influenza vaccination for the<br>patient? | <input type="checkbox"/> Yes<br><input type="checkbox"/> No<br><input type="checkbox"/> Patient refused vaccination<br><input type="checkbox"/> Patient received vaccination elsewhere |
| 6   | <b>Physical activity</b>                                                                            |                                                                                                                                                                                        |
| 6.1 | During the last 12 months:<br>Have you asked the patient<br>about his physical activity?            | <input type="checkbox"/> Yes<br><input type="checkbox"/> No                                                                                                                            |



## CAROL GP Questionnaire T1 (after 12 months)

Patient ID \_\_\_\_-\_\_\_\_

|     |                                                                                                   |                                                                                                                                                                                                                                                                                  |
|-----|---------------------------------------------------------------------------------------------------|----------------------------------------------------------------------------------------------------------------------------------------------------------------------------------------------------------------------------------------------------------------------------------|
| 6.2 | During the last 12 months:<br>Have you recommended<br>physical activity for this patient?         | <input type="checkbox"/> Yes<br><input type="checkbox"/> No<br><input type="checkbox"/> Patient was already sufficiently active                                                                                                                                                  |
| 6.3 | During the last 12 months:<br>Have you tested the<br>patient's physical capacity?                 | <input type="checkbox"/> Yes<br><input type="checkbox"/> No → continue to 6.5<br><input type="checkbox"/> Patient refused testing → continue to 6.5                                                                                                                              |
| 6.4 | Which method did you use to<br>test the patient's physical<br>capacity                            | <input type="checkbox"/> Ergometry<br><input type="checkbox"/> Sit to stand Test<br><input type="checkbox"/> 6 Minutes Walking Test<br><input type="checkbox"/> Other method: .....                                                                                              |
| 6.5 | During the last 12 months:<br>Have you sent the patient to<br>pulmonary rehabilitation?           | <input type="checkbox"/> Yes<br><input type="checkbox"/> No<br><input type="checkbox"/> Patient refused it                                                                                                                                                                       |
| 7   | <b>Patient education</b>                                                                          |                                                                                                                                                                                                                                                                                  |
| 7.1 | During the last 12 months:<br>Have you offered the<br>patient a COPD patient-<br>education class? | <input type="checkbox"/> Yes, and performed in my own practice<br><input type="checkbox"/> Yes, referred externally COPD<br><input type="checkbox"/> No<br><input type="checkbox"/> Patient refused it<br><input type="checkbox"/> Patient already received education previously |
| 7.2 | During the last 12 months:                                                                        | <input type="checkbox"/> General information about COPD and causes                                                                                                                                                                                                               |
| 7.3 | Which measures did you take<br>(Multiple choice item)                                             | <input type="checkbox"/> Information about COPD-Drugs and<br>side effects                                                                                                                                                                                                        |
| 7.4 |                                                                                                   | <input type="checkbox"/> Handed out a COPD brochure                                                                                                                                                                                                                              |
| 7.5 |                                                                                                   | <input type="checkbox"/> Drug Inhalation technique <b>explained</b><br><input type="checkbox"/> <b>Drug Inhalation technique demonstrated</b><br><input type="checkbox"/> <b>Drug Inhalation technique tested</b>                                                                |
| 7.6 |                                                                                                   | <input type="checkbox"/> Instruction in recognition of acute COPD<br>exacerbations and taking adequate measures                                                                                                                                                                  |

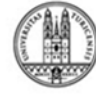

## CAROL GP Questionnaire T1 (after 12 months)

Patient ID \_\_-\_\_

|     |                                                                                                                                    |                                                                                                                                                                                                   |
|-----|------------------------------------------------------------------------------------------------------------------------------------|---------------------------------------------------------------------------------------------------------------------------------------------------------------------------------------------------|
| 7.7 | During the last 12 months:<br>Have you delivered to the patient a COPD exacerbation action plan including instructions and drugs ? | <input type="checkbox"/> Yes, I delivered a written COPD action plan<br><input type="checkbox"/> I explained this only verbally<br><input type="checkbox"/> No action plan delivered or explained |
| 8   | <b>Network / collaboration</b>                                                                                                     |                                                                                                                                                                                                   |
| 8.1 | During the last 12 months:                                                                                                         | <input type="checkbox"/> Lung specialist                                                                                                                                                          |
| 8.2 | Were you in contact with other healthcare caring for this patient?                                                                 | <input type="checkbox"/> Hospital                                                                                                                                                                 |
| 8.3 |                                                                                                                                    | <input type="checkbox"/> Physical therapist                                                                                                                                                       |
| 8.4 | Plase tick the box if Yes<br>Multiple Choice item                                                                                  | <input type="checkbox"/> Lung league                                                                                                                                                              |
| 8.5 |                                                                                                                                    | <input type="checkbox"/> Pulmonary rehabilitation                                                                                                                                                 |
| 8.6 |                                                                                                                                    | <input type="checkbox"/> Home care                                                                                                                                                                |
| 8.7 |                                                                                                                                    | <input type="checkbox"/> Self-help group                                                                                                                                                          |

## 9 Only for physicians in the intervention group

|     |                                                                                               |                                                                                                                                                                 |
|-----|-----------------------------------------------------------------------------------------------|-----------------------------------------------------------------------------------------------------------------------------------------------------------------|
| 9.1 | During the last 12 months:<br>How often have you used the COPD care bundle with this patient? | <input type="checkbox"/> during every consultation<br>Approximately. I__I__I times<br><input type="checkbox"/> never                                            |
| 9.2 | How have you used the care bundle for this patient?                                           | <input type="checkbox"/> As a checklist (to fill in)<br><input type="checkbox"/> As a reminder list (not fillig in)<br><input type="checkbox"/> Not used at all |



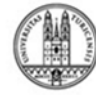

**CAROL** GP Questionnaire T1 (after 12 months)

Patient ID \_\_-\_\_

**Thank you!**

**Please do not forget!** The number on the questionnaire must match the patient ID number.

Please return the questionnaire using the prestamped envelope or by Fax to the number 044 255 90 97

Please contact us if you have any questions!

Tel. 044 255 98 55

Prof. Dr.med. C. Steurer-Stey

Prof. Dr. med. Thomas Rosemann

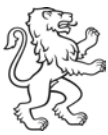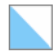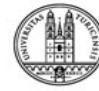

## CAROL Patient Questionnaire T0 (at inclusion)

Patient ID |\_|\_|-|\_|\_|

|     |      |                 |
|-----|------|-----------------|
| 0.1 | Date | _ _ . _ _ . _ _ |
|-----|------|-----------------|

### 1. General information

|     |                                                                                                        |                                                                                                                                                                                                                                                        |
|-----|--------------------------------------------------------------------------------------------------------|--------------------------------------------------------------------------------------------------------------------------------------------------------------------------------------------------------------------------------------------------------|
| 1.1 | Sex                                                                                                    | <input type="checkbox"/> <sub>(1)</sub> male <input type="checkbox"/> <sub>(2)</sub> female                                                                                                                                                            |
| 1.2 | Birthdate                                                                                              | _ _ . _ _ . _ _                                                                                                                                                                                                                                        |
| 1.3 | Employment                                                                                             | <input type="checkbox"/> <sub>(1)</sub> Still working<br><input type="checkbox"/> <sub>(2)</sub> Partially retired<br><input type="checkbox"/> <sub>(3)</sub> Fully retired<br><input type="checkbox"/> <sub>(4)</sub> Unemployed                      |
| 1.4 | How many years of education have you absolved (including elementary school, highschool and university) | <input type="checkbox"/> <sub>(1)</sub> ≤9<br><input type="checkbox"/> <sub>(2)</sub> 10-12<br><input type="checkbox"/> <sub>(3)</sub> ≥13                                                                                                             |
| 1.5 | What is your living situation?                                                                         | <input type="checkbox"/> <sub>(1)</sub> in partnership<br><input type="checkbox"/> <sub>(2)</sub> alone<br><input type="checkbox"/> <sub>(3)</sub> receiving outside help at home<br><input type="checkbox"/> <sub>(4)</sub> living in a care facility |

### 2. Information about you lung disease (COPD)

|     |                                                                                    |                                                                                                                                                                                                                                                                             |
|-----|------------------------------------------------------------------------------------|-----------------------------------------------------------------------------------------------------------------------------------------------------------------------------------------------------------------------------------------------------------------------------|
| 2.1 | Since when do you know about your lung disease?                                    | Month / Year  _ _  /  _ _                                                                                                                                                                                                                                                   |
| 2.2 | Do you smoke or have you smoked previously?                                        | <input type="checkbox"/> <sub>(1)</sub> I still smoke<br><input type="checkbox"/> <sub>(2)</sub> I am an ex-smoker                                                                                                                                                          |
| 2.3 | How many years of your life where you a smoker?                                    | Number of years:  _ _                                                                                                                                                                                                                                                       |
| 2.4 | On average, how many cigarettes did you smoke per day during your years as smoker? | Average number of cigarettes per day:  _ _                                                                                                                                                                                                                                  |
| 2.5 | If you are ex-smoker:<br>When did you quit smoking?                                | Ex-smoker since:<br>Month/Year  _ _ . _ _                                                                                                                                                                                                                                   |
| 2.6 | If your are a smoker<br>Are you motivated to quit smoking?                         | <input type="checkbox"/> <sub>(1)</sub> Yes<br><input type="checkbox"/> <sub>(2)</sub> No<br>Mark your current motivation to quit smoking on the scale below (0=not motivated at all, 10= highest possible motivation)<br><b>0 - 1 - 2 - 3 - 4 - 5 - 6 - 7 - 8 - 9 - 10</b> |
| 2.7 |                                                                                    |                                                                                                                                                                                                                                                                             |

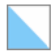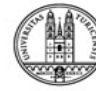

## CAROL Patient Questionnaire T0 (at inclusion)

Patient ID |\_\_|\_\_|\_|\_|\_|

### 3. Therapy recommendations during the last 12 months

|       |                                                                                                                                |                                                                                                                                                                                                                                                 |
|-------|--------------------------------------------------------------------------------------------------------------------------------|-------------------------------------------------------------------------------------------------------------------------------------------------------------------------------------------------------------------------------------------------|
| 3.1   | If you were a smoker during the last 12 months: Did your GP advise or motivate you to quit smoking?                            | <input type="checkbox"/> <sub>(1)</sub> Yes<br><input type="checkbox"/> <sub>(2)</sub> No                                                                                                                                                       |
| 3.2   | During the last 12 months: Did your GP offer you help to quit smoking?                                                         | <input type="checkbox"/> <sub>(1)</sub> Yes<br><input type="checkbox"/> <sub>(2)</sub> No                                                                                                                                                       |
| 3.3.  | During the last 12 months: Have you received an influenza vaccination from your GP?                                            | <input type="checkbox"/> <sub>(1)</sub> Yes<br><input type="checkbox"/> <sub>(2)</sub> No<br><input type="checkbox"/> <sub>(3)</sub> I refused to be vaccinated<br><input type="checkbox"/> <sub>(4)</sub> I received the vaccination elsewhere |
| 3.4.  | During the last 12 months: Has your GP asked about your physical activity?                                                     | <input type="checkbox"/> <sub>(1)</sub> Yes<br><input type="checkbox"/> <sub>(2)</sub> No                                                                                                                                                       |
| 3.5.  | During the last 12 months: Has your GP advised or motivated you to be physically active?                                       | <input type="checkbox"/> <sub>(1)</sub> Yes<br><input type="checkbox"/> <sub>(2)</sub> No                                                                                                                                                       |
| 3.6.  | During the last 12 months: Has your GP referred you to pulmonary rehabilitation?                                               | <input type="checkbox"/> <sub>(1)</sub> Yes<br><input type="checkbox"/> <sub>(2)</sub> No<br><input type="checkbox"/> <sub>(3)</sub> I refused this                                                                                             |
| 3.7.  | During the last 12 months: Has your GP offered you an education program or class for COPD?                                     | <input type="checkbox"/> <sub>(1)</sub> Yes<br><input type="checkbox"/> <sub>(2)</sub> No<br><input type="checkbox"/> <sub>(3)</sub> I refused this                                                                                             |
| 3.8.  | During the last 12 months: Have you received an information brochure or where you sufficiently informed about COPD by your GP? | <input type="checkbox"/> <sub>(1)</sub> Yes<br><input type="checkbox"/> <sub>(2)</sub> No                                                                                                                                                       |
| 3.9.  | During the last 12 months: Have you received knowledge about COPD and its causes?                                              | <input type="checkbox"/> <sub>(1)</sub> Yes, from my GP<br><input type="checkbox"/> <sub>(2)</sub> No<br><input type="checkbox"/> <sub>(3)</sub> Yes, by someone else than my GP                                                                |
| 3.10. |                                                                                                                                | If someone else, who? :<br>_____                                                                                                                                                                                                                |



## CAROL Patient Questionnaire T0 (at inclusion)

Patient ID |\_\_|\_\_|\_\_|\_\_|

|       |                                                                                                                                              |                                                                                                                                                                                                                                         |
|-------|----------------------------------------------------------------------------------------------------------------------------------------------|-----------------------------------------------------------------------------------------------------------------------------------------------------------------------------------------------------------------------------------------|
| 3.11. | During the last 12 months:<br>Have you received knowledge<br>about effects and side-effects of<br>drugs for COPD?                            | <input type="checkbox"/> <sup>(1)</sup> Yes, from my GP<br><input type="checkbox"/> <sup>(2)</sup> No<br><input type="checkbox"/> <sup>(3)</sup> Yes, by someone else than my GP<br><br>If someone else, who? :<br>_____                |
| 3.12. |                                                                                                                                              |                                                                                                                                                                                                                                         |
| 3.13. | During the last 12 months:<br>Was the <b>inhalation</b> of COPD drugs<br><b>explained</b> to you?                                            | <input type="checkbox"/> <sup>(1)</sup> Yes, by my GP or his assistant<br><input type="checkbox"/> <sup>(2)</sup> No<br><input type="checkbox"/> <sup>(3)</sup> Yes, by someone else than my GP<br><br>If someone else, who? :<br>_____ |
| 3.14. |                                                                                                                                              |                                                                                                                                                                                                                                         |
| 3.15. | During the last 12 months:<br>Was the <b>inhalation</b> of COPD<br>drugs <b>demonstrated</b> to you?                                         | <input type="checkbox"/> <sup>(1)</sup> Yes, by my GP or his assistant<br><input type="checkbox"/> <sup>(2)</sup> No<br><input type="checkbox"/> <sup>(3)</sup> Yes, by someone else than my GP<br><br>If someone else, who? :<br>_____ |
| 3.16. |                                                                                                                                              |                                                                                                                                                                                                                                         |
| 3.17. | During the last 12 months:<br>Was your <b>inhalation technique</b> of<br>COPD drugs <b>tested or assessed</b> ?                              | <input type="checkbox"/> <sup>(1)</sup> Yes, by my GP or his assistant<br><input type="checkbox"/> <sup>(2)</sup> No<br><input type="checkbox"/> <sup>(3)</sup> Yes, by someone else than my GP<br><br>If someone else, who? :<br>_____ |
| 3.18. |                                                                                                                                              |                                                                                                                                                                                                                                         |
| 3.19. | During the last 12 months:<br>Have you been explained how<br>to recognize an acute<br>worsening of you COPD?                                 | <input type="checkbox"/> <sup>(1)</sup> Yes, by my GP<br><input type="checkbox"/> <sup>(2)</sup> No<br><input type="checkbox"/> <sup>(3)</sup> Yes, by someone else than my GP<br><br>If someone else, who? :<br>_____                  |
| 3.20. |                                                                                                                                              |                                                                                                                                                                                                                                         |
| 3.21. | During the last 12 months:<br>Have you received an action plan<br>on what to do if an acute<br>worsening / exacerbation of COPD<br>occurred? | <input type="checkbox"/> <sup>(1)</sup> Yes, from my GP<br><input type="checkbox"/> <sup>(2)</sup> No<br><input type="checkbox"/> <sup>(3)</sup> Yes, from someone else than my GP<br><br>If someone else, who? :<br>_____              |
| 3.22. |                                                                                                                                              |                                                                                                                                                                                                                                         |



## CAROL Patient Questionnaire T0 (at inclusion)

Patient ID |\_\_|\_\_|\_\_|\_\_|

### 4. Your current symptoms

|     |                                                                                                                                                                                                     |                                                                                                                                                                                                                                                                                                                                                                                                                                                                                                                                                                                                                                                                                                                                                          |
|-----|-----------------------------------------------------------------------------------------------------------------------------------------------------------------------------------------------------|----------------------------------------------------------------------------------------------------------------------------------------------------------------------------------------------------------------------------------------------------------------------------------------------------------------------------------------------------------------------------------------------------------------------------------------------------------------------------------------------------------------------------------------------------------------------------------------------------------------------------------------------------------------------------------------------------------------------------------------------------------|
| 4.1 | Severity of your shortness of breath                                                                                                                                                                | <input type="checkbox"/> <sub>(1)</sub> I never have shortness of breath<br><input type="checkbox"/> <sub>(2)</sub> I only get breathless with strenuous exercise<br><input type="checkbox"/> <sub>(3)</sub> I get short of breath when hurrying on level ground or walking up a slight hill<br><input type="checkbox"/> <sub>(4)</sub> On level ground, I walk slower than people of the same age because of breathlessness, or I have to stop for breath when walking at my own pace on the level<br><input type="checkbox"/> <sub>(5)</sub> I stop for breath after walking about 100 yards or after a few minutes on level ground<br><input type="checkbox"/> <sub>(6)</sub> I am too breathless to leave the house or I am breathless when dressing |
| 4.2 | I am currently experiencing a worsening of my lung disease COPD                                                                                                                                     | <input type="checkbox"/> <sub>(1)</sub> Yes<br><input type="checkbox"/> <sub>(2)</sub> No                                                                                                                                                                                                                                                                                                                                                                                                                                                                                                                                                                                                                                                                |
| 4.3 | <b>Definition of a worsening of COPD:</b> When you have at least a worsening of two of the following symptoms: <b>Breathlessness, cough or phlegm</b> exceeding your normal day-to-day fluctuations | if yes, how do you react? (multiple choices possible)                                                                                                                                                                                                                                                                                                                                                                                                                                                                                                                                                                                                                                                                                                    |
| 4.4 |                                                                                                                                                                                                     | <input type="checkbox"/> <sub>(1)</sub> I take no special measures                                                                                                                                                                                                                                                                                                                                                                                                                                                                                                                                                                                                                                                                                       |
| 4.5 |                                                                                                                                                                                                     | <input type="checkbox"/> <sub>(1)</sub> I inhale more than normal                                                                                                                                                                                                                                                                                                                                                                                                                                                                                                                                                                                                                                                                                        |
| 4.6 |                                                                                                                                                                                                     | <input type="checkbox"/> <sub>(1)</sub> I take cortisone tablets<br><input type="checkbox"/> <sub>(1)</sub> I take antibiotics                                                                                                                                                                                                                                                                                                                                                                                                                                                                                                                                                                                                                           |

### 5. Your symptoms during the last 12 months

|      |                                                                            |                                                                                                                                                                                                          |
|------|----------------------------------------------------------------------------|----------------------------------------------------------------------------------------------------------------------------------------------------------------------------------------------------------|
| 5.1. | Phlegm from your lung during the last 12 months                            | <input type="checkbox"/> <sub>(1)</sub> Never<br><input type="checkbox"/> <sub>(2)</sub> rarely<br><input type="checkbox"/> <sub>(3)</sub> often<br><input type="checkbox"/> <sub>(4)</sub> all the time |
| 5.2. | Cough during the last 12 months                                            | <input type="checkbox"/> <sub>(1)</sub> Never<br><input type="checkbox"/> <sub>(2)</sub> rarely<br><input type="checkbox"/> <sub>(3)</sub> often<br><input type="checkbox"/> <sub>(4)</sub> all the time |
| 5.3  | During the last 12 months, how often have you seen your GP because of COPD | <input type="checkbox"/> never<br><input type="checkbox"/> once<br><input type="checkbox"/> more than once, approximately  __ __  times                                                                  |



## CAROL Patient Questionnaire T0 (at inclusion)

Patient ID |\_|\_|-|\_|\_|

|             |                                                                                                                                    |                                                                                                                                                                                                                   |
|-------------|------------------------------------------------------------------------------------------------------------------------------------|-------------------------------------------------------------------------------------------------------------------------------------------------------------------------------------------------------------------|
| 5.4         | During the last 12 months:<br>How often have you experienced an acute worsening of your lung disease COPD (see 4.2 for definition) | <input type="checkbox"/> never<br><input type="checkbox"/> once<br><input type="checkbox"/> more then once, approximatley  _ _  times                                                                             |
| 5.5         | How often have you reported such acute worsenings to your GP?                                                                      | <input type="checkbox"/> <sub>(1)</sub> never<br><input type="checkbox"/> <sub>(2)</sub> sometimes<br><input type="checkbox"/> <sub>(3)</sub> most of the times<br><input type="checkbox"/> <sub>(4)</sub> always |
| 5.6         | How often have you treated acute worsenings of COPD yourself wihout going to your GP?                                              | <input type="checkbox"/> <sub>(1)</sub> never<br><input type="checkbox"/> <sub>(2)</sub> sometimes<br><input type="checkbox"/> <sub>(3)</sub> most of the times<br><input type="checkbox"/> <sub>(4)</sub> always |
| 5.7         | During the last 12 months:<br>How often did you need urgent / unplanned consultations with your GP because of COPD?                | <input type="checkbox"/> never<br><input type="checkbox"/> once<br><input type="checkbox"/> more then once, approximatley  _ _  times                                                                             |
| 5.8         | During the last 12 months:<br>How often have you seen a lung specialist for your COPD? (not counting your GP)                      | <input type="checkbox"/> never<br><input type="checkbox"/> once<br><input type="checkbox"/> more then once, approximatley  _ _  times                                                                             |
| 5.9<br>5.10 | During the last 12 months: how often did you go to the hospital (emergency department or inpatient treatment)                      | _ _  times for inpatient treatment<br> _ _  times for outpatient treatment only                                                                                                                                   |



## CAROL Patient Questionnaire T0 (at inclusion)

Patient ID | \_ | \_ | - | \_ | \_ |

### 6. CAT (COPD Assessment Test)

Please tick the boxes which best describe your **current** symptoms. Please cross one box on each line.

|     |                                                                   |                                                                                                                                                                   |                                                                        |
|-----|-------------------------------------------------------------------|-------------------------------------------------------------------------------------------------------------------------------------------------------------------|------------------------------------------------------------------------|
| 6.1 | I never cough                                                     | <input type="checkbox"/> 0 <input type="checkbox"/> 1 <input type="checkbox"/> 2 <input type="checkbox"/> 3 <input type="checkbox"/> 4 <input type="checkbox"/> 5 | Ich cough all the time                                                 |
| 6.2 | I have no phlegm (mucus) in my chest at all                       | <input type="checkbox"/> 0 <input type="checkbox"/> 1 <input type="checkbox"/> 2 <input type="checkbox"/> 3 <input type="checkbox"/> 4 <input type="checkbox"/> 5 | My chest is full of phlegm (mucus)                                     |
| 6.3 | My chest does not feel tight at all                               | <input type="checkbox"/> 0 <input type="checkbox"/> 1 <input type="checkbox"/> 2 <input type="checkbox"/> 3 <input type="checkbox"/> 4 <input type="checkbox"/> 5 | My chest feels very tight                                              |
| 6.4 | When I walk up a hill or one flight of stairs I am not breathless | <input type="checkbox"/> 0 <input type="checkbox"/> 1 <input type="checkbox"/> 2 <input type="checkbox"/> 3 <input type="checkbox"/> 4 <input type="checkbox"/> 5 | When I walk up a hill or one flight of stairs I am very breathless     |
| 6.5 | I am not limited doing any activities at home                     | <input type="checkbox"/> 0 <input type="checkbox"/> 1 <input type="checkbox"/> 2 <input type="checkbox"/> 3 <input type="checkbox"/> 4 <input type="checkbox"/> 5 | I am very limited doing activities at home                             |
| 6.6 | I am confident leaving my home despite my lung condition          | <input type="checkbox"/> 0 <input type="checkbox"/> 1 <input type="checkbox"/> 2 <input type="checkbox"/> 3 <input type="checkbox"/> 4 <input type="checkbox"/> 5 | I am not at all confident leaving my home because of my lung condition |
| 6.7 | I sleep soundly                                                   | <input type="checkbox"/> 0 <input type="checkbox"/> 1 <input type="checkbox"/> 2 <input type="checkbox"/> 3 <input type="checkbox"/> 4 <input type="checkbox"/> 5 | I don't sleep soundly because of my lung condition                     |
| 6.8 | I have lots of energy                                             | <input type="checkbox"/> 0 <input type="checkbox"/> 1 <input type="checkbox"/> 2 <input type="checkbox"/> 3 <input type="checkbox"/> 4 <input type="checkbox"/> 5 | I have no energy at all                                                |

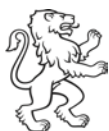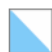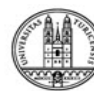

## CAROL Patient Questionnaire T0 (at inclusion)

Patient ID |\_\_|\_\_|\_|\_|\_|

### 7. Healthcare resources outside of your GP's practice

|      |                                                                                                                                     |                                                                  |
|------|-------------------------------------------------------------------------------------------------------------------------------------|------------------------------------------------------------------|
| 7.1  | Please mark other healthcare resources or professionals you have had contact with for treating your COPD during the last 12 months. | <input type="checkbox"/> <sub>(1)</sub> Lung specialist          |
| 7.2  |                                                                                                                                     | <input type="checkbox"/> <sub>(1)</sub> Hospital                 |
| 7.3  |                                                                                                                                     | <input type="checkbox"/> <sub>(1)</sub> Physical therapist       |
| 7.4  |                                                                                                                                     | <input type="checkbox"/> <sub>(1)</sub> Lung league              |
| 7.5  |                                                                                                                                     | <input type="checkbox"/> <sub>(1)</sub> pulmonary rehabilitation |
| 7.6  |                                                                                                                                     | <input type="checkbox"/> <sub>(1)</sub> Home care                |
| 7.7  |                                                                                                                                     | <input type="checkbox"/> .....                                   |
| 7.8. |                                                                                                                                     | <input type="checkbox"/> .....                                   |

### 8. Lung medication

Please fill in every lung medication (pills or inhalation including oxygen) you are currently prescribed

|     | Product name | Regimen<br>(Number of pills or inhalations) |        |         |       |                          |
|-----|--------------|---------------------------------------------|--------|---------|-------|--------------------------|
|     |              | mornign                                     | midday | evening | night | on demand                |
| 8.1 | .....        | _                                           | _      | _       | _     | <input type="checkbox"/> |
| 8.2 | .....        | _                                           | _      | _       | _     | <input type="checkbox"/> |
| 8.3 |              | _                                           | _      | _       | _     | <input type="checkbox"/> |
| 8.4 |              | _                                           | _      | _       | _     | <input type="checkbox"/> |
| 8.5 |              | _                                           | _      | _       | _     | <input type="checkbox"/> |
| 8.6 |              | _                                           | _      | _       | _     | <input type="checkbox"/> |
| 8.7 |              | _                                           | _      | _       | _     | <input type="checkbox"/> |
| 8.8 |              | _                                           | _      | _       | _     | <input type="checkbox"/> |



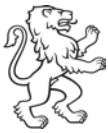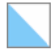

Kanton Zürich  
**Gesundheitsdirektion**  
Projekte & Entwicklung



**Universität  
Zürich**  
UZH  
Institut für Hausarztmedizin

## **CAROL** Patient Questionnaire T0 (at inclusion)

Patient ID | \_ | \_ | - | \_ | \_ |

**Thank you!**

Please return the questionnaire using the prestamped envelope.

Please contact us if you have any questions!

Tel. 044 255 98 55

PD Dr. med. C. Steurer-Stey

Prof. Dr. med. Thomas Rosemann

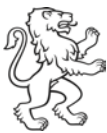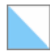

## CAROL Patient Questionnaire T1 (after 12 months)

Patient ID |\_|\_|-|\_|\_|

|     |      |                 |
|-----|------|-----------------|
| 0.1 | Date | _ _ . _ _ . _ _ |
|-----|------|-----------------|

### 1. Basic information

|     |           |                                                               |
|-----|-----------|---------------------------------------------------------------|
| 1.1 | Sex       | <input type="checkbox"/> male <input type="checkbox"/> female |
| 1.2 | Birthdate | _ _ . _ _ . _ _                                               |

### 2. Information about smoking

|     |                                                                                                                                |                                                                                                                                                                                                                                                                                                         |
|-----|--------------------------------------------------------------------------------------------------------------------------------|---------------------------------------------------------------------------------------------------------------------------------------------------------------------------------------------------------------------------------------------------------------------------------------------------------|
| 2.1 | Are you smoker or ex-smoker<br><br>(please follow the most suitable statements and the according arrows (→) on the right side) | <input type="checkbox"/> I am currently a smoker → continue to 2.2<br><input type="checkbox"/> I am an ex-smoker<br>please give approximate stopping date and continue below<br><br>Stopping Date (month.year)  _ _ . _ _ <br>Stopped before January 2015?<br>→ If yes, go to 2.3<br>→ If no, go to 3.1 |
| 2.2 | Are you motivated to quit smoking?                                                                                             | <input type="checkbox"/> Yes<br>Mark your current motivation to quit smoking on the scale below (0=not motivated at all, 10=highest possible motivation)<br><br><b>0 - 1 - 2 - 3 - 4 - 5 - 6 - 7 - 8 - 9 - 10</b><br><br><input type="checkbox"/> No                                                    |
| 2.3 | During the last 12 months: Did your GP ask about your motivation or advised you to quit smoking?                               | <input type="checkbox"/> Yes<br><input type="checkbox"/> No                                                                                                                                                                                                                                             |
| 2.4 | During the last 12 months: Did your GP offer you help to quit smoking?                                                         | <input type="checkbox"/> Yes<br><input type="checkbox"/> No                                                                                                                                                                                                                                             |



**CAROL** Patient Questionnaire T1 (after 12 months)

Patient ID |\_|\_|-|\_|\_|

**3. Therapy recommendations during the last 12 months**

|     |                                                                                                                                            |                                                                                                                                                                                                                                                                                                                     |
|-----|--------------------------------------------------------------------------------------------------------------------------------------------|---------------------------------------------------------------------------------------------------------------------------------------------------------------------------------------------------------------------------------------------------------------------------------------------------------------------|
| 3.1 | During the last 12 months:<br>Have you received an<br>influenza vaccination from your<br>GP?                                               | <input type="checkbox"/> <sub>(1)</sub> Yes<br><input type="checkbox"/> <sub>(2)</sub> No<br><input type="checkbox"/> <sub>(3)</sub> I refused to be vaccinated<br><input type="checkbox"/> <sub>(4)</sub> I received the vaccination elsewhere                                                                     |
| 3.2 | During the last 12 months:<br>Has your GP asked about your<br>physical activity?                                                           | <input type="checkbox"/> Yes<br><input type="checkbox"/> No                                                                                                                                                                                                                                                         |
| 3.3 | During the last 12 months:<br>Has your GP motivated or<br>advised you to be physically<br>active?                                          | <input type="checkbox"/> Yes<br><input type="checkbox"/> No                                                                                                                                                                                                                                                         |
| 3.4 | During the last 12 months:<br>Has your GP referred you to<br>pulmonary rehabilitation?                                                     | <input type="checkbox"/> <sub>(1)</sub> Yes<br><input type="checkbox"/> <sub>(2)</sub> No<br><input type="checkbox"/> <sub>(3)</sub> I refused this                                                                                                                                                                 |
| 3.5 | During the last 12 months:<br>Has your GP offer you any<br>kind of education program or<br>class for COPD?                                 | Multiple choice possible<br><input type="checkbox"/> Yes, I received this education from my GP<br><input type="checkbox"/> Yes, I received this education outside the GP's<br>practice<br><input type="checkbox"/> No, I received no such offer<br><input type="checkbox"/> I received such offer but I declined it |
| 3.6 | During the last 12 months:<br>Have you received an information<br>brochure or where you sufficiently<br>informed about COPD by your<br>GP? | <input type="checkbox"/> Yes<br><input type="checkbox"/> No                                                                                                                                                                                                                                                         |



## CAROL Patient Questionnaire T1 (after 12 months)

Patient ID | \_ | \_ | - | \_ | \_ |

|       |                                                                                                                                              |                                                                                                                                                                               |
|-------|----------------------------------------------------------------------------------------------------------------------------------------------|-------------------------------------------------------------------------------------------------------------------------------------------------------------------------------|
| 3.7.  | During the last 12 months:<br>Have you received knowledge<br>about COPD and its causes?                                                      | <input type="checkbox"/> Yes, from my GP / practice assistant<br><input type="checkbox"/> Yes, but outside the GP's practice,<br>namely: _____<br><input type="checkbox"/> No |
| 3.8   | During the last 12 months:<br>Have you received knowledge<br>about effects and side-effects of<br>drugs for COPD?                            | <input type="checkbox"/> Yes, from my GP / practice assistant<br><input type="checkbox"/> Yes, but outside the GP's practice,<br>namely: _____<br><input type="checkbox"/> No |
| 3.9   | During the last 12 months:<br>Was the <b>inhalation</b> of COPD drugs<br><b>explained</b> to you?                                            | <input type="checkbox"/> Yes, from my GP / practice assistant<br><input type="checkbox"/> Yes, but outside the GP's practice,<br>namely: _____<br><input type="checkbox"/> No |
| 3.10  | During the last 12 months:<br>Was the <b>inhalation</b> of COPD<br>drugs <b>demonstrated</b> to you?                                         | <input type="checkbox"/> Yes, from my GP / practice assistant<br><input type="checkbox"/> Yes, but outside the GP's practice,<br>namely: _____<br><input type="checkbox"/> No |
| 3.11  | During the last 12 months:<br>Was your <b>inhalation technique</b> of<br>COPD drugs <b>tested or assessed</b> ?                              | <input type="checkbox"/> Yes, from my GP / practice assistant<br><input type="checkbox"/> Yes, but outside the GP's practice,<br>namely: _____<br><input type="checkbox"/> No |
| 3.12. | During the last 12 months:<br>Have you been explained how<br>to recognize an acute<br>worsening of you COPD?                                 | <input type="checkbox"/> Yes, from my GP / practice assistant<br><input type="checkbox"/> Yes, but outside the GP's practice,<br>namely: _____<br><input type="checkbox"/> No |
| 3.13  | During the last 12 months:<br>Have you received an action plan<br>on what to do if an acute<br>worsening / exacerbation of COPD<br>occurred? | <input type="checkbox"/> Yes, from my GP / practice assistant<br><input type="checkbox"/> Yes, but outside the GP's practice,<br>namely: _____<br><input type="checkbox"/> No |



## CAROL Patient Questionnaire T1 (after 12 months)

Patient ID |\_\_|\_\_|\_\_|\_\_|

### 4. Your symptoms during the last 12 months

|      |                                                                                                                                                                                                                                                                             |                                                                                                                                                                                                                                                                                                                                                                                                                                                                                                                                                                                                                                                                                                                                                          |
|------|-----------------------------------------------------------------------------------------------------------------------------------------------------------------------------------------------------------------------------------------------------------------------------|----------------------------------------------------------------------------------------------------------------------------------------------------------------------------------------------------------------------------------------------------------------------------------------------------------------------------------------------------------------------------------------------------------------------------------------------------------------------------------------------------------------------------------------------------------------------------------------------------------------------------------------------------------------------------------------------------------------------------------------------------------|
| 4.1. | Phlegm from your lung during the last 12 months                                                                                                                                                                                                                             | <input type="checkbox"/> Never <input type="checkbox"/> rarely <input type="checkbox"/> often <input type="checkbox"/> all the time                                                                                                                                                                                                                                                                                                                                                                                                                                                                                                                                                                                                                      |
| 4.2. | Cough during the last 12 months                                                                                                                                                                                                                                             | <input type="checkbox"/> Nie <input type="checkbox"/> rarely <input type="checkbox"/> often <input type="checkbox"/> all the time                                                                                                                                                                                                                                                                                                                                                                                                                                                                                                                                                                                                                        |
| 4.3  | Severity of your shortness of breath                                                                                                                                                                                                                                        | <input type="checkbox"/> <sub>(1)</sub> I never have shortness of breath<br><input type="checkbox"/> <sub>(2)</sub> I only get breathless with strenuous exercise<br><input type="checkbox"/> <sub>(3)</sub> I get short of breath when hurrying on level ground or walking up a slight hill<br><input type="checkbox"/> <sub>(4)</sub> On level ground, I walk slower than people of the same age because of breathlessness, or I have to stop for breath when walking at my own pace on the level<br><input type="checkbox"/> <sub>(5)</sub> I stop for breath after walking about 100 yards or after a few minutes on level ground<br><input type="checkbox"/> <sub>(6)</sub> I am too breathless to leave the house or I am breathless when dressing |
| 4.4  | <p>How do you react when you experience an acute worsening of your COPD (exacerbation).</p> <p>An acute worsening is when you have at least a worsening of two of the following symptoms: Breathlessness, cough or phlegm exceeding your normal day-to-day fluctuations</p> | <p>Multiple choices are possible</p> <input type="checkbox"/> I take no special measures<br><input type="checkbox"/> I inhale more than normal<br><input type="checkbox"/> I take cortisone tablets<br><input type="checkbox"/> I take antibiotics<br><input type="checkbox"/> I have a written action plan that tells me what to do in such a case.<br><input type="checkbox"/> I make an appointment with my GP<br><input type="checkbox"/> I do something else: _____                                                                                                                                                                                                                                                                                 |



## CAROL Patient Questionnaire T1 (after 12 months)

Patient ID |\_\_|\_\_|-|\_\_|\_\_|

### 5. Health service for COPD during the last 12 months

|     |                                                                                                                                                     |                                                                                                                                                                                                                   |
|-----|-----------------------------------------------------------------------------------------------------------------------------------------------------|-------------------------------------------------------------------------------------------------------------------------------------------------------------------------------------------------------------------|
| 5.1 | During the last 12 months:<br>How often have you seen<br>your GP because of COPD                                                                    | <input type="checkbox"/> never<br><input type="checkbox"/> approximately  __ __  times                                                                                                                            |
| 5.2 | During the last 12 months: How<br>often have you experienced<br>acute worsening of COPD?<br>(Increase of phlegm, cough<br>oder shortness of breath) | <input type="checkbox"/> never<br><input type="checkbox"/> approximately  __ __  times                                                                                                                            |
| 5.3 | How often have you reported<br>such acute worsenings to<br>your GP?                                                                                 | <input type="checkbox"/> <sup>(1)</sup> never<br><input type="checkbox"/> <sup>(2)</sup> sometimes<br><input type="checkbox"/> <sup>(3)</sup> most of the times<br><input type="checkbox"/> <sup>(4)</sup> always |
| 5.4 | How often have you treated<br>acute worsenings of COPD<br>yourself without going to<br>your GP?                                                     | <input type="checkbox"/> <sup>(1)</sup> never<br><input type="checkbox"/> <sup>(2)</sup> sometimes<br><input type="checkbox"/> <sup>(3)</sup> most of the times<br><input type="checkbox"/> <sup>(4)</sup> always |
| 5.5 | During the last 12 months:<br>How often did you need<br>urgent / unplanned<br>consultations with your GP<br>because of COPD?                        | <input type="checkbox"/> never<br><input type="checkbox"/> approximately  __ __  times                                                                                                                            |
| 5.6 | During the last 12 months:<br>How often have you seen a<br>lung specialist for your COPD?<br>(not counting your GP)                                 | <input type="checkbox"/> never<br><input type="checkbox"/> approximately  __ __  times                                                                                                                            |
| 5.7 | During the last 12 months: how<br>often did you go to the hospital<br>(emergency department or<br>inpatient treatment)                              | __ __  times for inpatient treatment<br> __ __  times for outpatient treatment only                                                                                                                               |



## CAROL Patient Questionnaire T1 (after 12 months)

Patient ID |\_\_|\_\_|\_\_|\_\_|

### 6. CAT (COPD Assessment Test)

Please tick the boxes which best describe your **current** symptoms. Please cross one box on each line.

|     |                                                                   |                                                                                                                                                                   |                                                                        |
|-----|-------------------------------------------------------------------|-------------------------------------------------------------------------------------------------------------------------------------------------------------------|------------------------------------------------------------------------|
| 6.1 | I never cough                                                     | <input type="checkbox"/> 0 <input type="checkbox"/> 1 <input type="checkbox"/> 2 <input type="checkbox"/> 3 <input type="checkbox"/> 4 <input type="checkbox"/> 5 | Ich cough all the time                                                 |
| 6.2 | I have no phlegm (mucus) in my chest at all                       | <input type="checkbox"/> 0 <input type="checkbox"/> 1 <input type="checkbox"/> 2 <input type="checkbox"/> 3 <input type="checkbox"/> 4 <input type="checkbox"/> 5 | My chest is full of phlegm (mucus)                                     |
| 6.3 | My chest does not feel tight at all                               | <input type="checkbox"/> 0 <input type="checkbox"/> 1 <input type="checkbox"/> 2 <input type="checkbox"/> 3 <input type="checkbox"/> 4 <input type="checkbox"/> 5 | My chest feels very tight                                              |
| 6.4 | When I walk up a hill or one flight of stairs I am not breathless | <input type="checkbox"/> 0 <input type="checkbox"/> 1 <input type="checkbox"/> 2 <input type="checkbox"/> 3 <input type="checkbox"/> 4 <input type="checkbox"/> 5 | When I walk up a hill or one flight of stairs I am very breathless     |
| 6.5 | I am not limited doing any activities at home                     | <input type="checkbox"/> 0 <input type="checkbox"/> 1 <input type="checkbox"/> 2 <input type="checkbox"/> 3 <input type="checkbox"/> 4 <input type="checkbox"/> 5 | I am very limited doing activities at home                             |
| 6.6 | I am confident leaving my home despite my lung condition          | <input type="checkbox"/> 0 <input type="checkbox"/> 1 <input type="checkbox"/> 2 <input type="checkbox"/> 3 <input type="checkbox"/> 4 <input type="checkbox"/> 5 | I am not at all confident leaving my home because of my lung condition |
| 6.7 | I sleep soundly                                                   | <input type="checkbox"/> 0 <input type="checkbox"/> 1 <input type="checkbox"/> 2 <input type="checkbox"/> 3 <input type="checkbox"/> 4 <input type="checkbox"/> 5 | I don't sleep soundly because of my lung condition                     |
| 6.8 | I have lots of energy                                             | <input type="checkbox"/> 0 <input type="checkbox"/> 1 <input type="checkbox"/> 2 <input type="checkbox"/> 3 <input type="checkbox"/> 4 <input type="checkbox"/> 5 | I have no energy at all                                                |



## CAROL Patient Questionnaire T1 (after 12 months)

Patient ID |\_\_|\_\_|\_\_|\_\_|

### 7. Healthcare resources outside of your GP's practice

|      |                                                                                                                                     |                                                                  |
|------|-------------------------------------------------------------------------------------------------------------------------------------|------------------------------------------------------------------|
| 7.1  | Please mark other healthcare resources or professionals you have had contact with for treating your COPD during the last 12 months. | <input type="checkbox"/> <sub>(1)</sub> Lung specialist          |
| 7.2  |                                                                                                                                     | <input type="checkbox"/> <sub>(1)</sub> Hospital                 |
| 7.3  |                                                                                                                                     | <input type="checkbox"/> <sub>(1)</sub> Physical therapist       |
| 7.4  |                                                                                                                                     | <input type="checkbox"/> <sub>(1)</sub> Lung league              |
| 7.5  |                                                                                                                                     | <input type="checkbox"/> <sub>(1)</sub> pulmonary rehabilitation |
| 7.6  |                                                                                                                                     | <input type="checkbox"/> <sub>(1)</sub> Home care                |
| 7.7  |                                                                                                                                     | <input type="checkbox"/> .....                                   |
| 7.8. |                                                                                                                                     | <input type="checkbox"/> .....                                   |

### 8. Lung medication

Please fill in every lung medication (pills or inhalation including oxygen) you are currently prescribed

|     | Product name | Regimen<br>(Number of pills or inhalations) |                          |                          |                          |                          |
|-----|--------------|---------------------------------------------|--------------------------|--------------------------|--------------------------|--------------------------|
|     |              | mornign                                     | midday                   | evening                  | night                    | on demand                |
| 8.1 | .....        | <input type="checkbox"/>                    | <input type="checkbox"/> | <input type="checkbox"/> | <input type="checkbox"/> | <input type="checkbox"/> |
| 8.2 | .....        | <input type="checkbox"/>                    | <input type="checkbox"/> | <input type="checkbox"/> | <input type="checkbox"/> | <input type="checkbox"/> |
| 8.3 |              | <input type="checkbox"/>                    | <input type="checkbox"/> | <input type="checkbox"/> | <input type="checkbox"/> | <input type="checkbox"/> |
| 8.4 |              | <input type="checkbox"/>                    | <input type="checkbox"/> | <input type="checkbox"/> | <input type="checkbox"/> | <input type="checkbox"/> |
| 8.5 |              | <input type="checkbox"/>                    | <input type="checkbox"/> | <input type="checkbox"/> | <input type="checkbox"/> | <input type="checkbox"/> |
| 8.6 |              | <input type="checkbox"/>                    | <input type="checkbox"/> | <input type="checkbox"/> | <input type="checkbox"/> | <input type="checkbox"/> |
| 8.7 |              | <input type="checkbox"/>                    | <input type="checkbox"/> | <input type="checkbox"/> | <input type="checkbox"/> | <input type="checkbox"/> |
| 8.8 |              | <input type="checkbox"/>                    | <input type="checkbox"/> | <input type="checkbox"/> | <input type="checkbox"/> | <input type="checkbox"/> |





Kanton Zürich  
**Gesundheitsdirektion**  
Projekte & Entwicklung



**Universität  
Zürich**  
UZH  
Institut für Hausarztmedizin

## **CAROL** Patient Questionnaire T1 (after 12 months)

Patient ID |\_\_|\_\_|\_|\_|

**Thank you!**

Please return the questionnaire using the prestamped envelope.

Please contact us if you have any questions!

Tel. 044 255 98 55

Prof. Dr.med. C. Steurer-Stey

Prof. Dr. med. Thomas Rosemann
